# Supplementary material for: Theoretical Investigation on the Hydrogen Evolution, Oxygen Evolution, and Oxygen Reduction Reactions Performances of Two-Dimensional Metal-Organic Frameworks Fe3(C2X)12 (X = NH, O, S)
Source: MDPI journal article supplement (doi:10.3390/molecules27051528), 2022-02-24
Supplement: s1 [file s1]

## Supporting Information

### **Theoretical Investigation on the Hydrogen Evolution, Oxygen Evolution, and Oxygen Reduction Reactions Performances of Two-Dimensional Metal-Organic Frameworks $\text{Fe}_3(\text{C}_2\text{X})_{12}$ ( $\text{X}=\text{NH}$ , O, S)**

Xiaohang Yang <sup>1</sup>, Zhen Feng <sup>2,3,\*</sup> and Zhanyong Guo <sup>2</sup>

1 School of Science, Henan Institute of Technology, Xinxiang 453000, China;  
yangxh@hait.edu.cn

2 School of Materials Science and Engineering, Henan Institute of Technology,  
Xinxiang 453000, China; guozhanyong123@126.com

3 School of Physics, Henan Normal University, Xinxiang 453007, China

\* Correspondence: fengzhen@hait.edu.cn

## Supplementary Figures

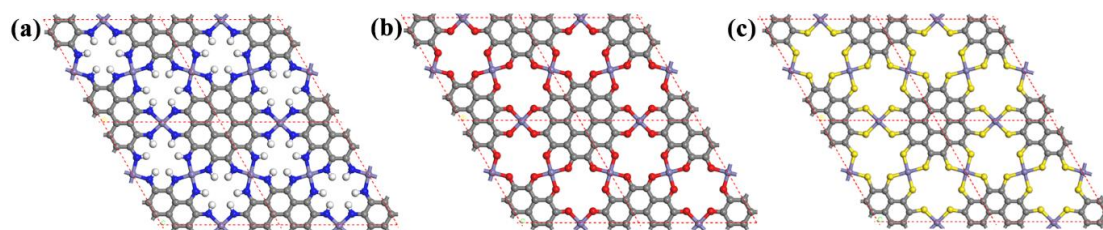

**Figure S1.** Supercell ( $2 \times 2$ ) of (a) Fe-NH-MOF, (b) Fe-O-MOF, and (c) Fe-S-MOF monolayers.

| Materials | Adsorbate/ Site | Top view                                                                             | Side view                                                                             |
|-----------|-----------------|--------------------------------------------------------------------------------------|---------------------------------------------------------------------------------------|
| Fe-NH-MOF | -               | 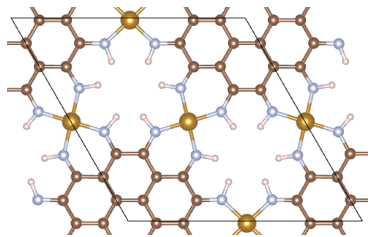   |    |
| Fe-NH-MOF | H/ Fe           |    |    |
| Fe-NH-MOF | H/ N            |   |   |
| Fe-NH-MOF | H/C1            |  |  |
| Fe-NH-MOF | H/C2            |  |  |
| Fe-NH-MOF | H/C3            |  |  |

|           |        |                                                                                      |                                                                                       |
|-----------|--------|--------------------------------------------------------------------------------------|---------------------------------------------------------------------------------------|
| Fe-NH-MOF | OOH/Fe | 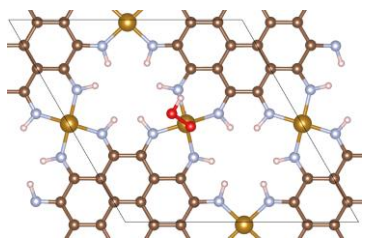   |    |
| Fe-NH-MOF | OOH/N  |    |    |
| Fe-NH-MOF | OOH/C1 |    |    |
| Fe-NH-MOF | OOH/C2 |   |   |
| Fe-NH-MOF | OOH/C3 |  |  |
| Fe-NH-MOF | OH/Fe  |  |  |
| Fe-NH-MOF | OH/N   |  |  |

|           |       |                                                                                      |                                                                                       |
|-----------|-------|--------------------------------------------------------------------------------------|---------------------------------------------------------------------------------------|
| Fe-NH-MOF | OH/C1 | 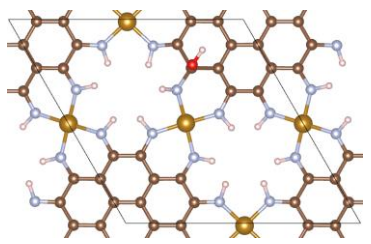   |    |
| Fe-NH-MOF | OH/C2 |    |    |
| Fe-NH-MOF | OH/C3 |    |    |
| Fe-NH-MOF | O/Fe  |   |   |
| Fe-NH-MOF | O/N   |  |  |
| Fe-NH-MOF | O/C1  |  |  |

**Figure S2.** The optimized top and side views of H, OOH, O, and OH on Fe-NH MOF monolayer.

| Materials | Adsorbate/ Site | Top view                                                                             | Side view                                                                             |
|-----------|-----------------|--------------------------------------------------------------------------------------|---------------------------------------------------------------------------------------|
| Fe-O-MOF  | -               | 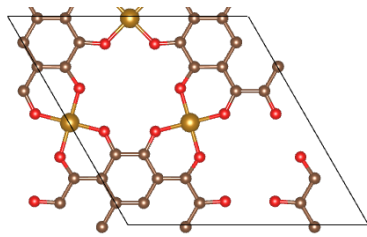   |    |
| Fe-O-MOF  | H/ Fe           |    |    |
| Fe-O-MOF  | H/ O            |   |   |
| Fe-O-MOF  | H/C1            |  |  |
| Fe-O-MOF  | H/C2            |  |  |
| Fe-O-MOF  | H/C3            |  |  |

|          |        |                                                                                      |                                                                                       |
|----------|--------|--------------------------------------------------------------------------------------|---------------------------------------------------------------------------------------|
| Fe-O-MOF | OOH/Fe | 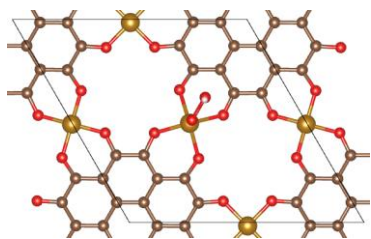   |    |
| Fe-O-MOF | OOH/O  |    |    |
| Fe-O-MOF | OOH/C1 |    |    |
| Fe-O-MOF | OOH/C2 |   |   |
| Fe-O-MOF | OOH/C3 |  |  |
| Fe-O-MOF | OH/Fe  |  |  |
| Fe-O-MOF | OH/O   |  |  |



|          |       |                                                                                      |                                                                                       |
|----------|-------|--------------------------------------------------------------------------------------|---------------------------------------------------------------------------------------|
| Fe-O-MOF | OH/C1 | 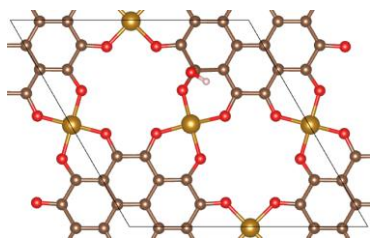   |    |
| Fe-O-MOF | OH/C2 |    |    |
| Fe-O-MOF | OH/C3 |    |    |
| Fe-O-MOF | O/Fe  |   |   |
| Fe-O-MOF | O/O   |  |  |

**Figure S3.** The optimized top and side views of H, OOH, O, and OH on Fe-O MOF monolayer.



| Materials | Adsorbate/ Site | Top view                                                                             | Side view                                                                             |
|-----------|-----------------|--------------------------------------------------------------------------------------|---------------------------------------------------------------------------------------|
| Fe-S-MOF  | -               | 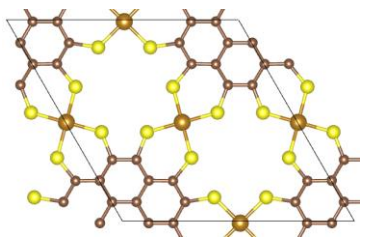   |    |
| Fe-S-MOF  | H/ Fe           |    |    |
| Fe-S-MOF  | H/ S            |   |   |
| Fe-S-MOF  | H/C1            |  |  |
| Fe-S-MOF  | H/C2            |  |  |
| Fe-S-MOF  | H/C3            |  |  |

|          |        |                                                                                      |                                                                                       |
|----------|--------|--------------------------------------------------------------------------------------|---------------------------------------------------------------------------------------|
| Fe-S-MOF | OOH/Fe | 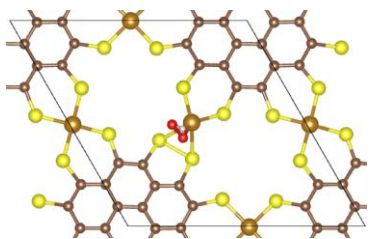   |    |
| Fe-S-MOF | OOH/S  |    |    |
| Fe-S-MOF | OOH/C1 |    |    |
| Fe-S-MOF | OOH/C2 |   |   |
| Fe-S-MOF | OOH/C3 |  |  |
| Fe-S-MOF | OH/Fe  |  |  |
| Fe-S-MOF | OH/S   |  |  |

|          |       |                                                                                      |                                                                                       |
|----------|-------|--------------------------------------------------------------------------------------|---------------------------------------------------------------------------------------|
| Fe-S-MOF | OH/C1 | 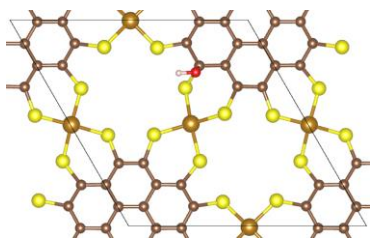   |    |
| Fe-S-MOF | OH/C2 |    |    |
| Fe-S-MOF | OH/C3 |    |    |
| Fe-S-MOF | O/Fe  |   |   |
| Fe-S-MOF | O/S   |  |  |

**Figure S4.** The optimized top and side views of H, OOH, O, and OH on Fe-S MOF monolayer.

## Supplementary Tables

**Table S1** Optimized lattice constants ( $l_a$ ) vs total energies ( $E_{\text{tot}}$ ) of Fe-NH-MOF, Fe-O-MOF, and Fe-S-MOF monolayers.

| Fe-NH MOF     |                           | Fe-O MOF      |                           | Fe-S-MOF      |                           |
|---------------|---------------------------|---------------|---------------------------|---------------|---------------------------|
| ( $l_a$ ) (Å) | ( $E_{\text{tot}}$ ) (eV) | ( $l_a$ ) (Å) | ( $E_{\text{tot}}$ ) (eV) | ( $l_a$ ) (Å) | ( $E_{\text{tot}}$ ) (eV) |
| 12.40         | -386.05408                | 12.00         | -321.59756                | 12.00         | -264.38453                |
| 12.50         | -386.40396                | 12.20         | -322.49340                | 12.28         | -267.22506                |
| 12.55         | -386.49375                | 12.25         | -322.58313                | 13.20         | -285.73598                |
| 12.58         | -386.52149                | 12.26         | -322.59447                | 13.55         | -287.37690                |
| 12.59         | -386.52601                | 12.27         | -322.60345                | 13.57         | -287.40530                |
| 12.60         | -386.52834                | 12.28         | -322.6090                 | 13.60         | -287.43616                |
| <b>12.61</b>  | <b>-386.52848</b>         | 12.29         | -322.61517                | 13.62         | -287.44920                |
| 12.62         | -386.52667                | 12.30         | -322.61840                | 13.63         | -287.45322                |
| 12.64         | -386.51676                | <b>12.31</b>  | <b>-322.61878</b>         | 13.64         | -287.45576                |
| 12.66         | -386.49899                | 12.32         | -322.61743                | <b>13.65</b>  | <b>-287.45689</b>         |
| 12.68         | -386.47318                | 12.33         | -322.61401                | 13.66         | -287.45649                |
| 12.70         | -386.43955                | 12.34         | -322.60868                | 13.67         | -287.45466                |
| 12.80         | -386.16279                | 12.35         | -322.60124                | 13.68         | -287.45121                |
| -             | -                         | 12.40         | -322.53530                | 13.70         | -287.44023                |
| -             | -                         | 12.50         | -322.30643                | 13.75         | -287.38960                |
| -             | -                         | -             | -                         | 13.80         | -287.30549                |
